# Supplementary material for: Graphene oxide as an interface phase between polyetheretherketone and hydroxyapatite for tissue engineering scaffolds
Source: PubMed Central journal article supplement (PMC5397874; doi:10.1038/srep46604), 2017-04-20
Supplement: srep46604-s1.pdf [file srep46604-s1.pdf]

**Graphene oxide as an interface phase between polyetheretherketone and hydroxyapatite for  
tissue engineering scaffolds**

**Shuping Peng<sup>1,2,3,#</sup>, Pei Feng<sup>4,#</sup>, Ping Wu<sup>6</sup>, Wei Huang<sup>4</sup>, Youwen Yang<sup>4</sup>, Wang Guo<sup>4</sup>, Chengde  
Gao<sup>4</sup>, Cijun Shuai<sup>4,5,\*</sup>**

## Supporting information

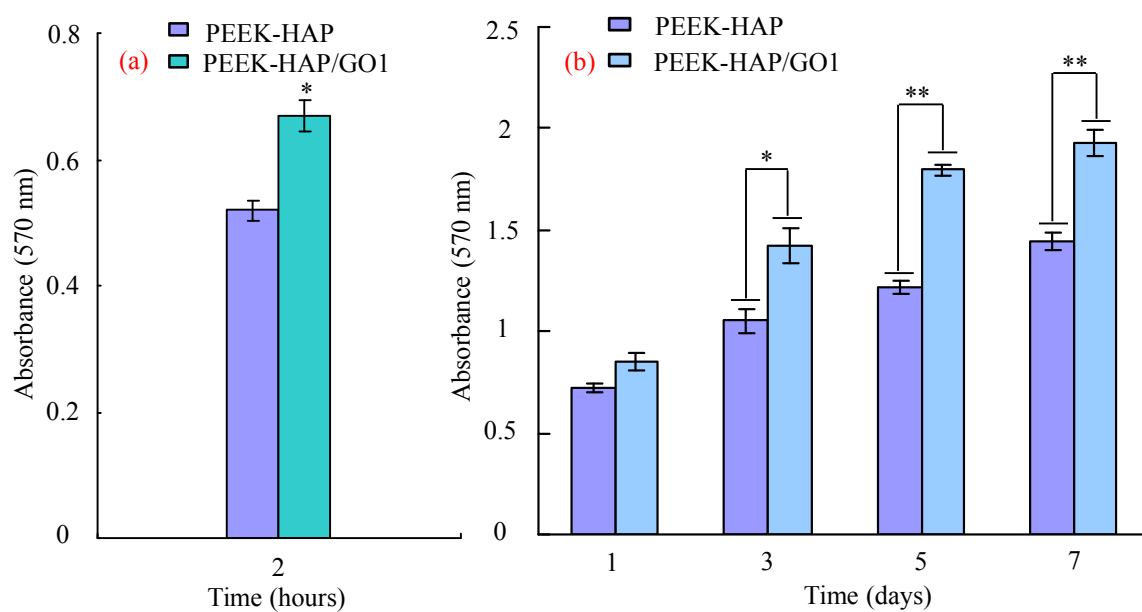

**Figure S1. MG-63 cells adhesion and proliferation.** Adhesion of MG-63 cells on the scaffolds at 2 hours after culture (a ), proliferation of MG-63 cells on the scaffolds for 1 day, 3 days, 5 days and 7 days. The data represent the mean  $\pm$  SD (n=6). \*, statistically significant difference ( $P < 0.05$ ); \*\*, very significant difference ( $P < 0.01$ ).

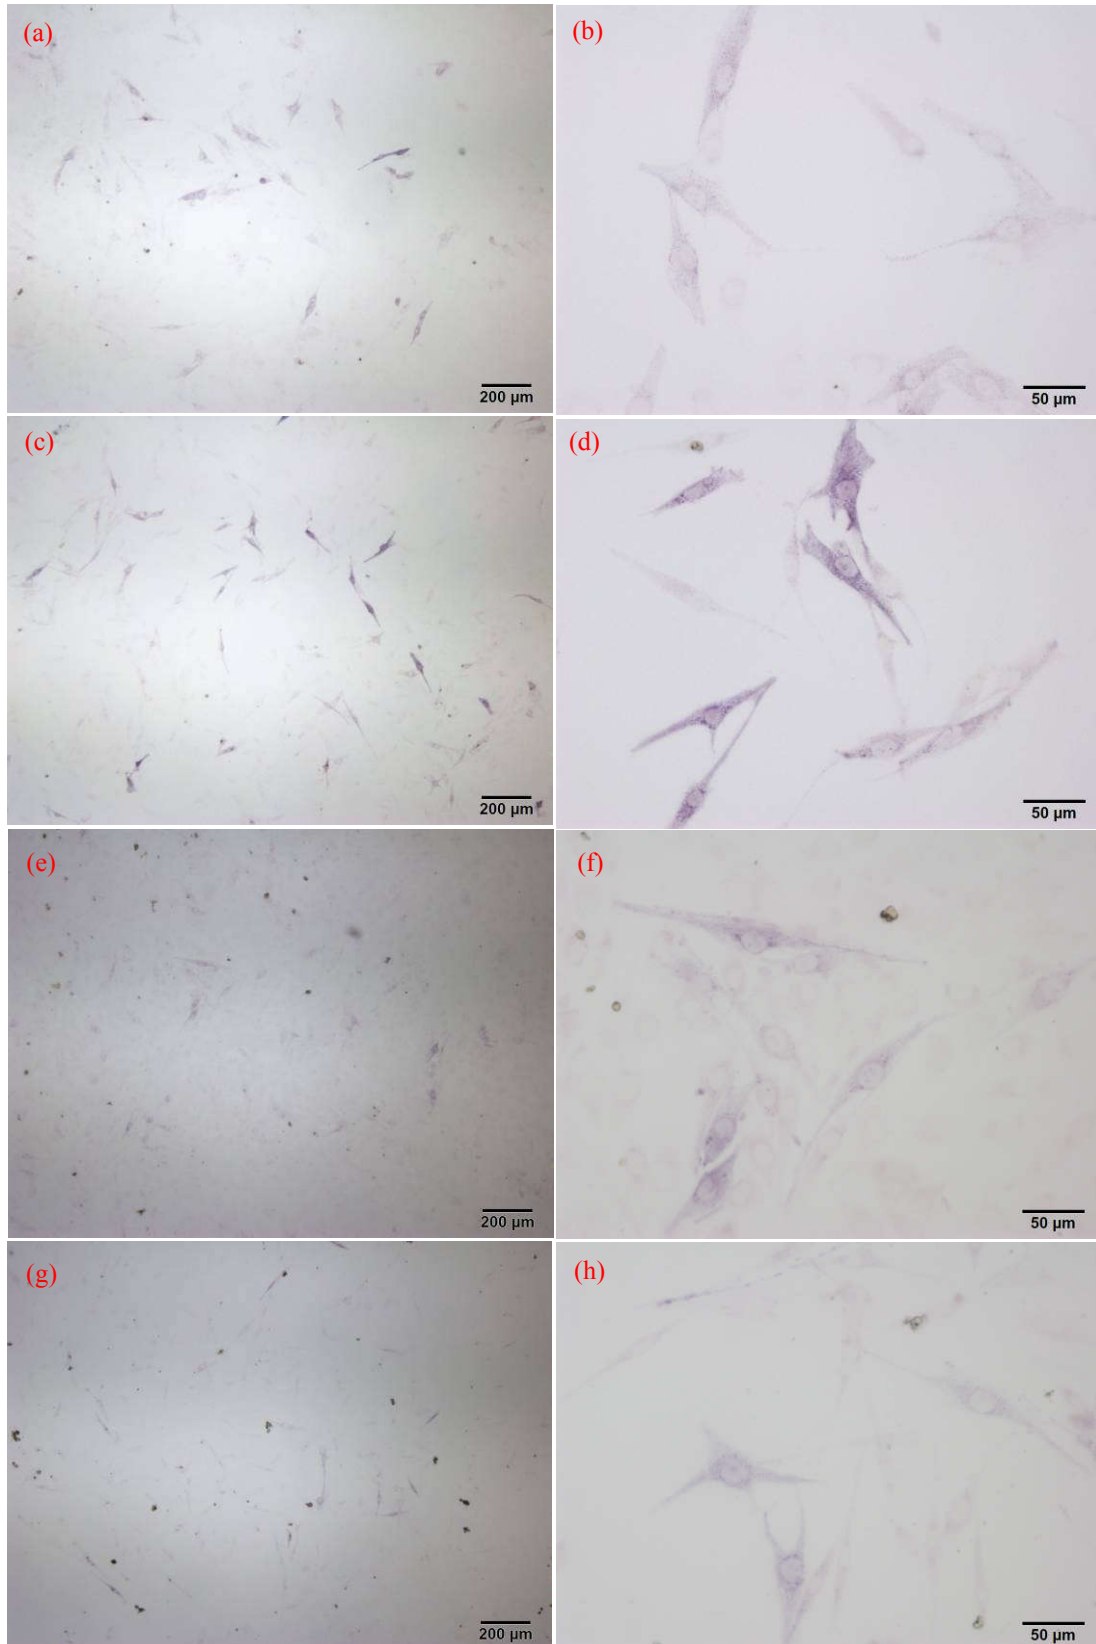

**Figure S2. ALP staining images.** MG-63 cells after culturing on the PEEK-HAP/GO1 scaffolds for 1 day (a and b), 3 days (c and d), 5 days (e and f) and 7 days (g and h).

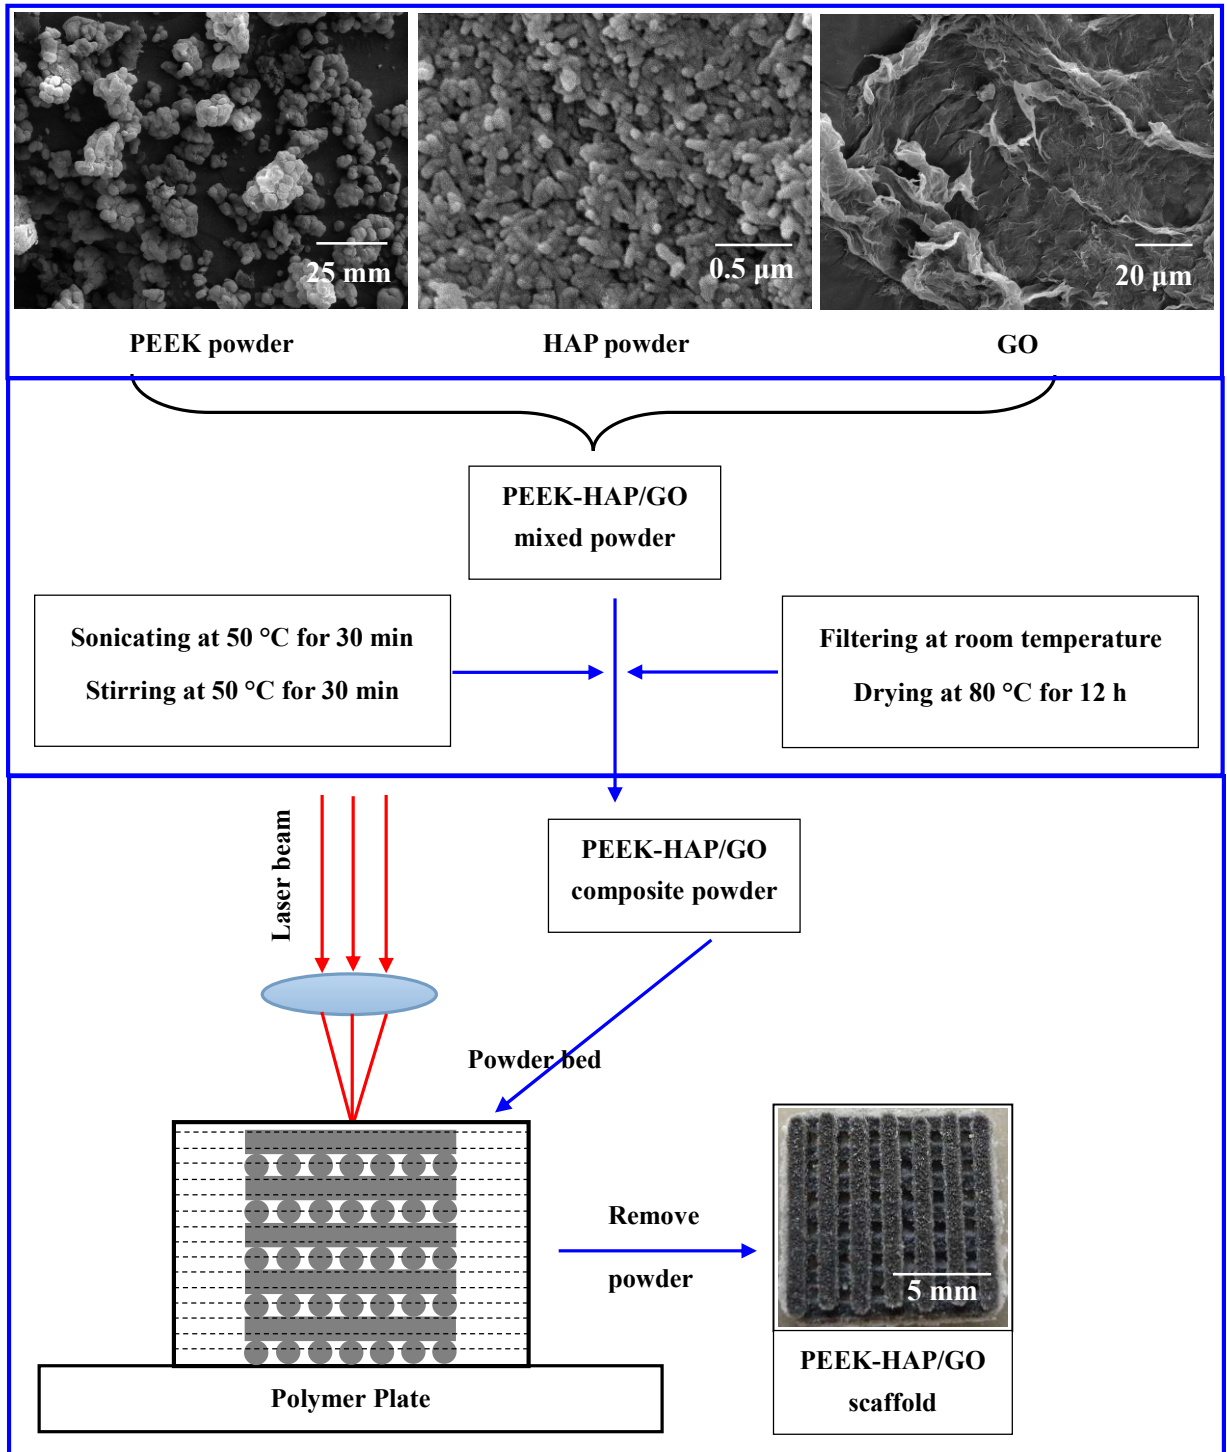

Figure S3. Schematic of the procedure used to fabricate PEEK-HAP/GO scaffold.
